# Supplementary material for: Photophysical properties and the NO photorelease mechanism of a ruthenium nitrosyl model complex investigated using the CASSCF-in-DFT embedding approach
Source: Royal Society of Chemistry journal article supplement (doi:10.1039/c7cp01642e), 2017-01-01
Supplement: c7cp01642e1.pdf [file c7cp01642e1.pdf]

## Electronic Supplementary Information

### **Photophysical Properties and NO photorelease Mechanism of a Ruthenium Nitrosyl Model Complex by the CASSCF-in-DFT Embedding Approach**

Ana P. de Lima Batista,<sup>a</sup> Antonio G. S. de Oliveira-Filho,<sup>\*a</sup> and Sérgio E. Galembeck<sup>a</sup>

<sup>a</sup> *Departamento de Química, Faculdade de Filosofia, Ciências e Letras de Ribeirão Preto, Universidade de São Paulo, Ribeirão Preto - SP, Brazil.*

*E-mail: antoniogsof@ffclrp.usp.br*

1- Optimized Geometries:

a) *trans*-[RuCl(NO)(NH<sub>3</sub>)<sub>4</sub>]<sup>2+</sup> in S<sub>0</sub> electronic state (BP86/def2-TZVPP level of theory):

| 20                  |               |               |               |
|---------------------|---------------|---------------|---------------|
| BP86/DEF2-TZVPP S_0 |               |               |               |
| Ru                  | -0.0354901590 | -0.0000255988 | 0.0000001650  |
| N                   | 0.1141957226  | 2.1537014636  | -0.0000012944 |
| N                   | 0.1154228581  | 0.0000194251  | 2.1536464834  |
| N                   | 0.1172159963  | -2.1535480762 | -0.0000012193 |
| N                   | 0.1154221103  | 0.0000192740  | -2.1536410027 |
| N                   | -1.8069072663 | -0.0010613112 | -0.0000000338 |
| O                   | -2.9557304564 | -0.0015722845 | -0.0000009786 |
| Cl                  | 2.2601114032  | 0.0015008470  | 0.0000013205  |
| H                   | 1.1150703030  | 2.3922673265  | -0.0000028062 |
| H                   | -0.3005094557 | 2.6189434741  | -0.8156271339 |
| H                   | -0.3005088042 | 2.6189480333  | 0.8156199441  |
| H                   | 1.1164123192  | -0.0000536293 | -2.3917100456 |
| H                   | -0.2991585383 | -0.8155415625 | -2.6191141133 |
| H                   | -0.2989443087 | 0.8157080245  | -2.6190653550 |
| H                   | 1.1164128337  | -0.0000534090 | 2.3917152569  |
| H                   | -0.2991585722 | -0.8155416743 | 2.6191199372  |
| H                   | -0.2989432749 | 0.8157069828  | 2.6190704725  |
| H                   | 1.1184795945  | -2.3904776539 | -0.0000027897 |
| H                   | -0.2966962877 | -2.6194719279 | 0.8156357044  |
| H                   | -0.2966970184 | -2.6194677234 | -0.8156425111 |

b) *trans*-[RuCl(NO)(NH<sub>3</sub>)<sub>4</sub>]<sup>2+</sup> in T<sub>1</sub> electronic state (BP86/def2-TZVPP level of theory):

| 20                  |               |               |               |
|---------------------|---------------|---------------|---------------|
| BP86/DEF2-TZVPP T_1 |               |               |               |
| Ru                  | 0.0578080345  | -0.0125522875 | 0.0533565256  |
| N                   | 0.0101115631  | 2.1345876603  | -0.1048087936 |
| N                   | 0.0609669871  | -0.1193276015 | 2.2187838017  |
| N                   | 0.2059117717  | -2.1643094274 | -0.0123150864 |
| N                   | 0.1915554735  | -0.0584177485 | -2.0957389341 |
| N                   | -1.8695127374 | 0.0451471403  | 0.1266738438  |
| O                   | -2.7541606145 | 0.6360216622  | -0.3523189783 |
| Cl                  | 2.3649748616  | 0.2192626050  | 0.2130057603  |
| H                   | 0.8374075311  | 2.4710091085  | -0.6147812252 |
| H                   | -0.8232220565 | 2.5197830742  | -0.5676338998 |
| H                   | 0.0576026700  | 2.6014694739  | 0.8093933800  |
| H                   | 1.1812654800  | -0.0248055106 | -2.3746354045 |
| H                   | -0.2098562976 | -0.8949803796 | -2.5368441293 |
| H                   | -0.2713252201 | 0.7299418545  | -2.5642442548 |
| H                   | 0.9859813077  | -0.4153267191 | 2.5570178304  |
| H                   | -0.6416752983 | -0.7645094077 | 2.6006973868  |
| H                   | -0.1281106855 | 0.7801028210  | 2.6770147266  |
| H                   | 1.0662141842  | -2.4646295769 | -0.4884157283 |
| H                   | 0.2604329527  | -2.5790321826 | 0.9256793366  |
| H                   | -0.5823699075 | -2.6394365584 | -0.4698841579 |

2- Composition of molecular orbitals in terms of atomic orbitals:

$$\sigma_{\text{NO}} = -0.71 (2p_z^{\text{O}}) + 0.61 (2p_z^{\text{N}}) + 0.41 (2s^{\text{O}})$$

$$\pi_{x,y} = 0.69 (2p_{x,y}^{\text{O}}) + 0.61 (2p_{x,y}^{\text{N}})$$

$$\text{Cl } p_z = 0.86 (3p_z^{\text{Cl}})$$

$$\text{Cl } p_{x,y} = 0.90 (3p_{x,y}^{\text{Cl}})$$

$$d_{xy} = 1.01 (3d_{xy}^{\text{Ru}})$$

$$d_{xz,yz} = 0.84 (3d_{xz,yz}^{\text{Ru}}) + 0.44 (2p_{x,y}^{\text{O}})$$

$$d_{xz,yz} - \pi_{x,y}^* = 0.54 (3d_{xz,yz}^{\text{Ru}}) - 0.68 (2p_{x,y}^{\text{O}}) + 0.81 (2p_{x,y}^{\text{N}})$$

$$d_{z^2} = 0.82 (3d_{z^2}^{\text{Ru}})$$

$$d_{x^2-y^2} = 0.85 (3d_{x^2-y^2}^{\text{Ru}})$$

$$\sigma_{\text{NO}}^* = 1.21 (2p_z^{\text{O}}) + 1.17 (2p_z^{\text{N}})$$

3- SA-CASSCF(18,14)-in-BP86 Energies:

S<sub>0</sub> = -908.69600765 HARTREE  
S<sub>1</sub> = -908.56482410 HARTREE  
S<sub>2</sub> = -908.56475482 HARTREE  
S<sub>3</sub> = -908.55823252 HARTREE  
S<sub>4</sub> = -908.55703180 HARTREE  
S<sub>5</sub> = -908.55434476 HARTREE  
S<sub>6</sub> = -908.52689246 HARTREE  
S<sub>7</sub> = -908.50178800 HARTREE  
S<sub>8</sub> = -908.50171230 HARTREE  
S<sub>9</sub> = -908.49213272 HARTREE  
S<sub>10</sub> = -908.47161806 HARTREE  
S<sub>11</sub> = -908.47121374 HARTREE  
T<sub>1</sub> = -908.57899301 HARTREE  
T<sub>2</sub> = -908.56878741 HARTREE  
T<sub>3</sub> = -908.56872527 HARTREE  
T<sub>4</sub> = -908.56789007 HARTREE  
T<sub>5</sub> = -908.56767316 HARTREE  
T<sub>6</sub> = -908.56095640 HARTREE  
T<sub>7</sub> = -908.55332921 HARTREE  
T<sub>8</sub> = -908.53560140 HARTREE  
T<sub>9</sub> = -908.51846934 HARTREE  
T<sub>10</sub> = -908.51835248 HARTREE  
T<sub>11</sub> = -908.49829973 HARTREE  
T<sub>12</sub> = -908.49809014 HARTREE

4- Singlet electronic configurations  
state 1,  $S_0$

$$\begin{aligned}
|S_0\rangle = & +0.8876 |(Cl p_x)^2 (Cl p_y)^2 (Cl p_z)^2 (\sigma_{NO})^2 (\pi_x)^2 (\pi_y)^2 (d_{xy})^2 (d_{xz})^2 (d_{yz})^2 \rangle \\
& -0.1083 |(Cl p_x)^2 (Cl p_y)^2 (Cl p_z)^2 (\sigma_{NO})^2 (\pi_x)^2 (\pi_y)^2 (d_{xy})^2 (d_{xz})^\beta (d_{yz})^2 (d_{yz} - \pi_y^*)^\alpha \rangle \\
& +0.1083 |(Cl p_x)^2 (Cl p_y)^2 (Cl p_z)^2 (\sigma_{NO})^2 (\pi_x)^2 (\pi_y)^2 (d_{xy})^2 (d_{xz})^\alpha (d_{yz})^2 (d_{yz} - \pi_y^*)^\beta \rangle \\
& -0.1089 |(Cl p_x)^2 (Cl p_y)^2 (Cl p_z)^2 (\sigma_{NO})^2 (\pi_x)^2 (\pi_y)^2 (d_{xy})^2 (d_{xz})^2 (d_{yz})^\beta (d_{xz} - \pi_x^*)^\alpha \rangle \\
& +0.1089 |(Cl p_x)^2 (Cl p_y)^2 (Cl p_z)^2 (\sigma_{NO})^2 (\pi_x)^2 (\pi_y)^2 (d_{xy})^2 (d_{xz})^2 (d_{yz})^\alpha (d_{xz} - \pi_x^*)^\beta \rangle \\
& -0.1459 |(Cl p_x)^2 (Cl p_y)^2 (Cl p_z)^2 (\sigma_{NO})^2 (\pi_x)^2 (\pi_y)^2 (d_{xy})^2 (d_{yz})^2 (d_{yz} - \pi_y^*)^2 \rangle \\
& -0.1467 |(Cl p_x)^2 (Cl p_y)^2 (Cl p_z)^2 (\sigma_{NO})^2 (\pi_x)^2 (\pi_y)^2 (d_{xy})^2 (d_{xz})^2 (d_{xz} - \pi_x^*)^2 \rangle \\
& +0.1149 |(Cl p_x)^2 (Cl p_y)^2 (Cl p_z)^2 (\sigma_{NO})^2 (\pi_x)^2 (\pi_y)^2 (d_{xy})^2 (d_{xz})^\alpha (d_{yz})^\beta (d_{xz} - \pi_x^*)^\alpha (d_{yz} - \pi_y^*)^\beta \rangle \\
& +0.1149 |(Cl p_x)^2 (Cl p_y)^2 (Cl p_z)^2 (\sigma_{NO})^2 (\pi_x)^2 (\pi_y)^2 (d_{xy})^2 (d_{xz})^\beta (d_{yz})^\alpha (d_{xz} - \pi_x^*)^\beta (d_{yz} - \pi_y^*)^\alpha \rangle
\end{aligned}$$

State 2,  $S_1$

$$\begin{aligned}
|S_1\rangle = & +0.6314 |(Cl p_x)^2 (Cl p_y)^2 (Cl p_z)^2 (\sigma_{NO})^2 (\pi_x)^2 (\pi_y)^2 (d_{xy})^\alpha (d_{xz})^2 (d_{yz})^2 (d_{yz} - \pi_y^*)^\beta \rangle \\
& -0.6314 |(Cl p_x)^2 (Cl p_y)^2 (Cl p_z)^2 (\sigma_{NO})^2 (\pi_x)^2 (\pi_y)^2 (d_{xy})^\beta (d_{xz})^2 (d_{yz})^2 (d_{yz} - \pi_y^*)^\alpha \rangle \\
& +0.1553 |(Cl p_x)^2 (Cl p_y)^2 (Cl p_z)^2 (\sigma_{NO})^2 (\pi_x)^2 (\pi_y)^2 (d_{xy})^\alpha (d_{xz})^\beta (d_{yz})^2 (d_{yz} - \pi_y^*)^2 \rangle \\
& -0.1553 |(Cl p_x)^2 (Cl p_y)^2 (Cl p_z)^2 (\sigma_{NO})^2 (\pi_x)^2 (\pi_y)^2 (d_{xy})^\beta (d_{xz})^\alpha (d_{yz})^2 (d_{yz} - \pi_y^*)^2 \rangle \\
& +0.1307 |(Cl p_x)^2 (Cl p_y)^2 (Cl p_z)^2 (\sigma_{NO})^2 (\pi_x)^2 (\pi_y)^2 (d_{xy})^\alpha (d_{xz})^2 (d_{yz})^\beta (d_{xz} - \pi_x^*)^\alpha (d_{yz} - \pi_y^*)^\beta \rangle \\
& +0.1307 |(Cl p_x)^2 (Cl p_y)^2 (Cl p_z)^2 (\sigma_{NO})^2 (\pi_x)^2 (\pi_y)^2 (d_{xy})^\beta (d_{xz})^2 (d_{yz})^\alpha (d_{xz} - \pi_x^*)^\beta (d_{yz} - \pi_y^*)^\alpha \rangle \\
& -0.1085 |(Cl p_x)^2 (Cl p_y)^2 (Cl p_z)^2 (\sigma_{NO})^2 (\pi_x)^2 (\pi_y)^2 (d_{xy})^\alpha (d_{xz})^2 (d_{yz})^\alpha (d_{xz} - \pi_x^*)^\beta (d_{yz} - \pi_y^*)^\beta \rangle \\
& -0.1085 |(Cl p_x)^2 (Cl p_y)^2 (Cl p_z)^2 (\sigma_{NO})^2 (\pi_x)^2 (\pi_y)^2 (d_{xy})^\beta (d_{xz})^2 (d_{yz})^\beta (d_{xz} - \pi_x^*)^\alpha (d_{yz} - \pi_y^*)^\alpha \rangle
\end{aligned}$$

State 3,  $S_2$

$$\begin{aligned}
|S_2\rangle = & -0.6314 |(Cl p_x)^2 (Cl p_y)^2 (Cl p_z)^2 (\sigma_{NO})^2 (\pi_x)^2 (\pi_y)^2 (d_{xy})^\alpha (d_{xz})^2 (d_{yz})^2 (d_{xz} - \pi_x^*)^\beta \rangle \\
& +0.6314 |(Cl p_x)^2 (Cl p_y)^2 (Cl p_z)^2 (\sigma_{NO})^2 (\pi_x)^2 (\pi_y)^2 (d_{xy})^\beta (d_{xz})^2 (d_{yz})^2 (d_{xz} - \pi_x^*)^\alpha \rangle \\
& -0.1557 |(Cl p_x)^2 (Cl p_y)^2 (Cl p_z)^2 (\sigma_{NO})^2 (\pi_x)^2 (\pi_y)^2 (d_{xy})^\alpha (d_{xz})^2 (d_{yz})^\beta (d_{xz} - \pi_x^*)^2 \rangle \\
& +0.1557 |(Cl p_x)^2 (Cl p_y)^2 (Cl p_z)^2 (\sigma_{NO})^2 (\pi_x)^2 (\pi_y)^2 (d_{xy})^\beta (d_{xz})^2 (d_{yz})^\alpha (d_{xz} - \pi_x^*)^2 \rangle \\
& +0.1303 |(Cl p_x)^2 (Cl p_y)^2 (Cl p_z)^2 (\sigma_{NO})^2 (\pi_x)^2 (\pi_y)^2 (d_{xy})^\alpha (d_{xz})^\beta (d_{yz})^2 (d_{xz} - \pi_x^*)^\beta (d_{yz} - \pi_y^*)^\alpha \rangle \\
& +0.1303 |(Cl p_x)^2 (Cl p_y)^2 (Cl p_z)^2 (\sigma_{NO})^2 (\pi_x)^2 (\pi_y)^2 (d_{xy})^\beta (d_{xz})^\alpha (d_{yz})^2 (d_{xz} - \pi_x^*)^\alpha (d_{yz} - \pi_y^*)^\beta \rangle \\
& -0.1081 |(Cl p_x)^2 (Cl p_y)^2 (Cl p_z)^2 (\sigma_{NO})^2 (\pi_x)^2 (\pi_y)^2 (d_{xy})^\alpha (d_{xz})^\alpha (d_{yz})^2 (d_{xz} - \pi_x^*)^\beta (d_{yz} - \pi_y^*)^\beta \rangle \\
& -0.1081 |(Cl p_x)^2 (Cl p_y)^2 (Cl p_z)^2 (\sigma_{NO})^2 (\pi_x)^2 (\pi_y)^2 (d_{xy})^\beta (d_{xz})^\beta (d_{yz})^2 (d_{xz} - \pi_x^*)^\alpha (d_{yz} - \pi_y^*)^\alpha \rangle
\end{aligned}$$

State 4,  $S_3$

$$\begin{aligned}
|S_3\rangle = & -0.1020 |(Cl p_x)^2 (Cl p_y)^2 (Cl p_z)^2 (\sigma_{NO})^2 (\pi_x)^2 (\pi_y)^2 (d_{xy})^\alpha (d_{xz})^2 (d_{yz})^2 (d_{x^2-y^2})^\beta \rangle \\
& +0.1020 |(Cl p_x)^2 (Cl p_y)^2 (Cl p_z)^2 (\sigma_{NO})^2 (\pi_x)^2 (\pi_y)^2 (d_{xy})^\beta (d_{xz})^2 (d_{yz})^2 (d_{x^2-y^2})^\alpha \rangle \\
& +0.5362 |(Cl p_x)^2 (Cl p_y)^2 (Cl p_z)^2 (\sigma_{NO})^2 (\pi_x)^2 (\pi_y)^2 (d_{xy})^2 (d_{xz})^2 (d_{yz})^\beta (d_{yz} - \pi_y^*)^\alpha \rangle \\
& -0.5362 |(Cl p_x)^2 (Cl p_y)^2 (Cl p_z)^2 (\sigma_{NO})^2 (\pi_x)^2 (\pi_y)^2 (d_{xy})^2 (d_{xz})^2 (d_{yz})^\alpha (d_{yz} - \pi_y^*)^\beta \rangle \\
& -0.3631 |(Cl p_x)^2 (Cl p_y)^2 (Cl p_z)^2 (\sigma_{NO})^2 (\pi_x)^2 (\pi_y)^2 (d_{xy})^2 (d_{xz})^\beta (d_{yz})^2 (d_{xz} - \pi_x^*)^\alpha \rangle \\
& +0.3631 |(Cl p_x)^2 (Cl p_y)^2 (Cl p_z)^2 (\sigma_{NO})^2 (\pi_x)^2 (\pi_y)^2 (d_{xy})^2 (d_{xz})^\alpha (d_{yz})^2 (d_{xz} - \pi_x^*)^\beta \rangle
\end{aligned}$$

State 5,  $S_4$

$$\begin{aligned}
|S_4\rangle = & +0.1567 |(Cl p_x)^2 (Cl p_y)^2 (Cl p_z)^2 (\sigma_{NO})^2 (\pi_x)^2 (\pi_y)^2 (d_{xy})^\beta (d_{xz})^2 (d_{yz})^2 (d_z)^2 \alpha \rangle \\
& -0.1567 |(Cl p_x)^2 (Cl p_y)^2 (Cl p_z)^2 (\sigma_{NO})^2 (\pi_x)^2 (\pi_y)^2 (d_{xy})^\alpha (d_{xz})^2 (d_{yz})^2 (d_z)^2 \beta \rangle \\
& +0.3503 |(Cl p_x)^2 (Cl p_y)^2 (Cl p_z)^2 (\sigma_{NO})^2 (\pi_x)^2 (\pi_y)^2 (d_{xy})^2 (d_{xz})^2 (d_{yz})^\beta (d_{yz} - \pi_y^*)^\alpha \rangle \\
& -0.3503 |(Cl p_x)^2 (Cl p_y)^2 (Cl p_z)^2 (\sigma_{NO})^2 (\pi_x)^2 (\pi_y)^2 (d_{xy})^2 (d_{xz})^2 (d_{yz})^\alpha (d_{yz} - \pi_y^*)^\beta \rangle \\
& +0.5269 |(Cl p_x)^2 (Cl p_y)^2 (Cl p_z)^2 (\sigma_{NO})^2 (\pi_x)^2 (\pi_y)^2 (d_{xy})^2 (d_{xz})^\beta (d_{yz})^2 (d_{xz} - \pi_x^*)^\alpha \rangle \\
& -0.5269 |(Cl p_x)^2 (Cl p_y)^2 (Cl p_z)^2 (\sigma_{NO})^2 (\pi_x)^2 (\pi_y)^2 (d_{xy})^2 (d_{xz})^\alpha (d_{yz})^2 (d_{xz} - \pi_x^*)^\beta \rangle
\end{aligned}$$

State 6,  $S_5$

$$\begin{aligned}
|S_5\rangle = & -0.4601 |(Cl p_x)^2 (Cl p_y)^2 (Cl p_z)^2 (\sigma_{NO})^2 (\pi_x)^2 (\pi_y)^2 (d_{xy})^\beta (d_{xz})^2 (d_{xz} - \pi_x^*)^\alpha \rangle \\
& +0.4601 |(Cl p_x)^2 (Cl p_y)^2 (Cl p_z)^2 (\sigma_{NO})^2 (\pi_x)^2 (\pi_y)^2 (d_{xy})^2 (d_{xz})^\alpha (d_{yz})^2 (d_{yz} - \pi_y^*)^\beta \rangle \\
& +0.4595 |(Cl p_x)^2 (Cl p_y)^2 (Cl p_z)^2 (\sigma_{NO})^2 (\pi_x)^2 (\pi_y)^2 (d_{xy})^2 (d_{xz})^2 (d_{yz})^\beta (d_{xz} - \pi_x^*)^\alpha \rangle \\
& -0.4595 |(Cl p_x)^2 (Cl p_y)^2 (Cl p_z)^2 (\sigma_{NO})^2 (\pi_x)^2 (\pi_y)^2 (d_{xy})^2 (d_{xz})^2 (d_{yz})^\alpha (d_{xz} - \pi_x^*)^\beta \rangle \\
& -0.1572 |(Cl p_x)^2 (Cl p_y)^2 (Cl p_z)^2 (\sigma_{NO})^2 (\pi_x)^2 (\pi_y)^2 (d_{xy})^2 (d_{yz})^2 (d_{yz} - \pi_y^*)^2 \rangle \\
& +0.1570 |(Cl p_x)^2 (Cl p_y)^2 (Cl p_z)^2 (\sigma_{NO})^2 (\pi_x)^2 (\pi_y)^2 (d_{xy})^2 (d_{xz})^2 (d_{xz} - \pi_x^*)^2 \rangle
\end{aligned}$$

State 7,  $S_6$

$$\begin{aligned}
|S_6\rangle = & +0.6232 |(Cl p_x)^2 (Cl p_y)^2 (Cl p_z)^2 (\sigma_{NO})^2 (\pi_x)^2 (\pi_y)^2 (d_{xy})^\alpha (d_{xz})^2 (d_{yz})^2 (d_{x^2-y^2})^\beta \rangle \\
& -0.6232 |(Cl p_x)^2 (Cl p_y)^2 (Cl p_z)^2 (\sigma_{NO})^2 (\pi_x)^2 (\pi_y)^2 (d_{xy})^\beta (d_{xz})^2 (d_{yz})^2 (d_{x^2-y^2})^\alpha \rangle \\
& -0.1002 |(Cl p_x)^2 (Cl p_y)^2 (Cl p_z)^2 (\sigma_{NO})^2 (\pi_x)^2 (\pi_y)^2 (d_{xy})^\alpha (d_{xz})^2 (d_{xz} - \pi_x^*)^2 (d_{x^2-y^2})^\beta \rangle \\
& +0.1002 |(Cl p_x)^2 (Cl p_y)^2 (Cl p_z)^2 (\sigma_{NO})^2 (\pi_x)^2 (\pi_y)^2 (d_{xy})^\beta (d_{xz})^2 (d_{xz} - \pi_x^*)^2 (d_{x^2-y^2})^\alpha \rangle
\end{aligned}$$

State 8,  $S_7$

$$\begin{aligned}
|S_7\rangle = & -0.5822 |(Cl p_x)^2 (Cl p_y)^2 (Cl p_z)^2 (\sigma_{NO})^2 (\pi_x)^2 (\pi_y)^2 (d_{xy})^2 (d_{xz})^2 (d_{yz})^\beta (d_z)^2 \alpha \rangle \\
& +0.5822 |(Cl p_x)^2 (Cl p_y)^2 (Cl p_z)^2 (\sigma_{NO})^2 (\pi_x)^2 (\pi_y)^2 (d_{xy})^2 (d_{xz})^2 (d_{yz})^\alpha (d_z)^2 \beta \rangle \\
& -0.1566 |(Cl p_x)^2 (Cl p_y)^2 (Cl p_z)^2 (\sigma_{NO})^2 (\pi_x)^2 (\pi_y)^2 (d_{xy})^2 (d_{xz})^2 (d_{yz})^\beta (d_{x^2-y^2})^\alpha \rangle \\
& +0.1566 |(Cl p_x)^2 (Cl p_y)^2 (Cl p_z)^2 (\sigma_{NO})^2 (\pi_x)^2 (\pi_y)^2 (d_{xy})^2 (d_{xz})^2 (d_{yz})^\alpha (d_{x^2-y^2})^\beta \rangle \\
& -0.1546 |(Cl p_x)^2 (Cl p_y)^2 (Cl p_z)^2 (\sigma_{NO})^2 (\pi_x)^2 (\pi_y)^2 (d_{xy})^2 (d_{xz})^\beta (d_{yz})^\beta (d_{yz} - \pi_y^*)^\alpha (d_z)^2 \alpha \rangle \\
& -0.1546 |(Cl p_x)^2 (Cl p_y)^2 (Cl p_z)^2 (\sigma_{NO})^2 (\pi_x)^2 (\pi_y)^2 (d_{xy})^2 (d_{xz})^\alpha (d_{yz})^\alpha (d_{yz} - \pi_y^*)^\beta (d_z)^2 \beta \rangle \\
& +0.1311 |(Cl p_x)^2 (Cl p_y)^2 (Cl p_z)^2 (\sigma_{NO})^2 (\pi_x)^2 (\pi_y)^2 (d_{xy})^2 (d_{xz})^\alpha (d_{yz})^\beta (d_{yz} - \pi_y^*)^\beta (d_z)^2 \alpha \rangle \\
& +0.1311 |(Cl p_x)^2 (Cl p_y)^2 (Cl p_z)^2 (\sigma_{NO})^2 (\pi_x)^2 (\pi_y)^2 (d_{xy})^2 (d_{xz})^\beta (d_{yz})^\alpha (d_{yz} - \pi_y^*)^\alpha (d_z)^2 \beta \rangle \\
& +0.1175 |(Cl p_x)^2 (Cl p_y)^2 (Cl p_z)^2 (\sigma_{NO})^2 (\pi_x)^2 (\pi_y)^2 (d_{xy})^2 (d_{yz})^\beta (d_{yz} - \pi_y^*)^2 (d_z)^2 \alpha \rangle \\
& -0.1175 |(Cl p_x)^2 (Cl p_y)^2 (Cl p_z)^2 (\sigma_{NO})^2 (\pi_x)^2 (\pi_y)^2 (d_{xy})^2 (d_{yz})^\alpha (d_{yz} - \pi_y^*)^2 (d_z)^2 \beta \rangle
\end{aligned}$$

State 9,  $S_8$

$$\begin{aligned}
|S_8\rangle = & -0.5818 |(Cl p_x)^2 (Cl p_y)^2 (Cl p_z)^2 (\sigma_{NO})^2 (\pi_x)^2 (\pi_y)^2 (d_{xy})^2 (d_{xz})^\alpha (d_{yz})^2 (d_{z^2})^\beta \rangle \\
& +0.5818 |(Cl p_x)^2 (Cl p_y)^2 (Cl p_z)^2 (\sigma_{NO})^2 (\pi_x)^2 (\pi_y)^2 (d_{xy})^2 (d_{xz})^\beta (d_{yz})^2 (d_{z^2})^\alpha \rangle \\
& +0.1577 |(Cl p_x)^2 (Cl p_y)^2 (Cl p_z)^2 (\sigma_{NO})^2 (\pi_x)^2 (\pi_y)^2 (d_{xy})^2 (d_{xz})^\alpha (d_{yz})^2 (d_{x^2-y^2})^\beta \rangle \\
& -0.1577 |(Cl p_x)^2 (Cl p_y)^2 (Cl p_z)^2 (\sigma_{NO})^2 (\pi_x)^2 (\pi_y)^2 (d_{xy})^2 (d_{xz})^\beta (d_{yz})^2 (d_{x^2-y^2})^\alpha \rangle \\
& -0.1544 |(Cl p_x)^2 (Cl p_y)^2 (Cl p_z)^2 (\sigma_{NO})^2 (\pi_x)^2 (\pi_y)^2 (d_{xy})^2 (d_{xz})^\beta (d_{yz})^\beta (d_{xz} - \pi_x^*)^\alpha (d_{z^2})^\alpha \rangle \\
& -0.1544 |(Cl p_x)^2 (Cl p_y)^2 (Cl p_z)^2 (\sigma_{NO})^2 (\pi_x)^2 (\pi_y)^2 (d_{xy})^2 (d_{xz})^\alpha (d_{yz})^\alpha (d_{xz} - \pi_x^*)^\beta (d_{z^2})^\beta \rangle \\
& +0.1310 |(Cl p_x)^2 (Cl p_y)^2 (Cl p_z)^2 (\sigma_{NO})^2 (\pi_x)^2 (\pi_y)^2 (d_{xy})^2 (d_{xz})^\beta (d_{yz})^\alpha (d_{xz} - \pi_x^*)^\beta (d_{z^2})^\alpha \rangle \\
& +0.1310 |(Cl p_x)^2 (Cl p_y)^2 (Cl p_z)^2 (\sigma_{NO})^2 (\pi_x)^2 (\pi_y)^2 (d_{xy})^2 (d_{xz})^\alpha (d_{yz})^\beta (d_{xz} - \pi_x^*)^\alpha (d_{z^2})^\beta \rangle \\
& +0.1178 |(Cl p_x)^2 (Cl p_y)^2 (Cl p_z)^2 (\sigma_{NO})^2 (\pi_x)^2 (\pi_y)^2 (d_{xy})^2 (d_{xz})^\alpha (d_{xz} - \pi_x^*)^2 (d_{z^2})^\beta \rangle \\
& -0.1178 |(Cl p_x)^2 (Cl p_y)^2 (Cl p_z)^2 (\sigma_{NO})^2 (\pi_x)^2 (\pi_y)^2 (d_{xy})^2 (d_{xz})^\beta (d_{xz} - \pi_x^*)^2 (d_{z^2})^\alpha \rangle
\end{aligned}$$

State 10,  $S_9$

$$\begin{aligned}
|S_9\rangle = & -0.6062 |(Cl p_x)^2 (Cl p_y)^2 (Cl p_z)^2 (\sigma_{NO})^2 (\pi_x)^2 (\pi_y)^2 (d_{xy})^\beta (d_{xz})^2 (d_{yz})^2 (d_{z^2})^\alpha \rangle \\
& +0.6062 |(Cl p_x)^2 (Cl p_y)^2 (Cl p_z)^2 (\sigma_{NO})^2 (\pi_x)^2 (\pi_y)^2 (d_{xy})^\alpha (d_{xz})^2 (d_{yz})^2 (d_{z^2})^\beta \rangle \\
& +0.1116 |(Cl p_x)^2 (Cl p_y)^2 (Cl p_z)^2 (\sigma_{NO})^2 (\pi_x)^2 (\pi_y)^2 (d_{xy})^2 (d_{xz})^2 (d_{yz})^\beta (d_{yz} - \pi_y^*)^\alpha \rangle \\
& -0.1116 |(Cl p_x)^2 (Cl p_y)^2 (Cl p_z)^2 (\sigma_{NO})^2 (\pi_x)^2 (\pi_y)^2 (d_{xy})^2 (d_{xz})^2 (d_{yz})^\alpha (d_{yz} - \pi_y^*)^\beta \rangle \\
& +0.1127 |(Cl p_x)^2 (Cl p_y)^2 (Cl p_z)^2 (\sigma_{NO})^2 (\pi_x)^2 (\pi_y)^2 (d_{xy})^2 (d_{xz})^\beta (d_{yz})^2 (d_{xz} - \pi_x^*)^\alpha \rangle \\
& -0.1127 |(Cl p_x)^2 (Cl p_y)^2 (Cl p_z)^2 (\sigma_{NO})^2 (\pi_x)^2 (\pi_y)^2 (d_{xy})^2 (d_{xz})^\alpha (d_{yz})^2 (d_{xz} - \pi_x^*)^\beta \rangle
\end{aligned}$$

State 11,  $S_{10}$

$$\begin{aligned}
|S_{10}\rangle = & +0.1459 |(Cl p_x)^2 (Cl p_y)^2 (Cl p_z)^2 (\sigma_{NO})^2 (\pi_x)^2 (\pi_y)^2 (d_{xy})^2 (d_{xz})^2 (d_{yz})^\beta (d_{z^2})^\alpha \rangle \\
& -0.1459 |(Cl p_x)^2 (Cl p_y)^2 (Cl p_z)^2 (\sigma_{NO})^2 (\pi_x)^2 (\pi_y)^2 (d_{xy})^2 (d_{xz})^2 (d_{yz})^\alpha (d_{z^2})^\beta \rangle \\
& -0.5570 |(Cl p_x)^2 (Cl p_y)^2 (Cl p_z)^2 (\sigma_{NO})^2 (\pi_x)^2 (\pi_y)^2 (d_{xy})^2 (d_{xz})^2 (d_{yz})^\beta (d_{x^2-y^2})^\alpha \rangle \\
& +0.5570 |(Cl p_x)^2 (Cl p_y)^2 (Cl p_z)^2 (\sigma_{NO})^2 (\pi_x)^2 (\pi_y)^2 (d_{xy})^2 (d_{xz})^2 (d_{yz})^\alpha (d_{x^2-y^2})^\beta \rangle \\
& +0.1464 |(Cl p_x)^2 (Cl p_y)^2 (Cl p_z)^2 (\sigma_{NO})^2 (\pi_x)^2 (\pi_y)^2 (d_{xy})^2 (d_{xz})^\alpha (d_{yz})^\beta (d_{yz} - \pi_y^*)^\beta (d_{x^2-y^2})^\alpha \rangle \\
& +0.1464 |(Cl p_x)^2 (Cl p_y)^2 (Cl p_z)^2 (\sigma_{NO})^2 (\pi_x)^2 (\pi_y)^2 (d_{xy})^2 (d_{xz})^\beta (d_{yz})^\alpha (d_{yz} - \pi_y^*)^\alpha (d_{x^2-y^2})^\beta \rangle \\
& -0.1406 |(Cl p_x)^2 (Cl p_y)^2 (Cl p_z)^2 (\sigma_{NO})^2 (\pi_x)^2 (\pi_y)^2 (d_{xy})^2 (d_{xz})^2 (d_{xz} - \pi_x^*)^\beta (d_{x^2-y^2})^\alpha \rangle \\
& +0.1406 |(Cl p_x)^2 (Cl p_y)^2 (Cl p_z)^2 (\sigma_{NO})^2 (\pi_x)^2 (\pi_y)^2 (d_{xy})^2 (d_{xz})^2 (d_{xz} - \pi_x^*)^\alpha (d_{x^2-y^2})^\beta \rangle \\
& -0.1287 |(Cl p_x)^2 (Cl p_y)^2 (Cl p_z)^2 (\sigma_{NO})^2 (\pi_x)^2 (\pi_y)^2 (d_{xy})^2 (d_{xz})^\beta (d_{yz})^\beta (d_{yz} - \pi_y^*)^\alpha (d_{x^2-y^2})^\alpha \rangle \\
& -0.1287 |(Cl p_x)^2 (Cl p_y)^2 (Cl p_z)^2 (\sigma_{NO})^2 (\pi_x)^2 (\pi_y)^2 (d_{xy})^2 (d_{xz})^\alpha (d_{yz})^\alpha (d_{yz} - \pi_y^*)^\beta (d_{x^2-y^2})^\beta \rangle \\
& +0.1069 |(Cl p_x)^2 (Cl p_y)^2 (Cl p_z)^2 (\sigma_{NO})^2 (\pi_x)^2 (\pi_y)^2 (d_{xy})^2 (d_{yz})^\beta (d_{yz} - \pi_y^*)^2 (d_{x^2-y^2})^\alpha \rangle \\
& -0.1069 |(Cl p_x)^2 (Cl p_y)^2 (Cl p_z)^2 (\sigma_{NO})^2 (\pi_x)^2 (\pi_y)^2 (d_{xy})^2 (d_{yz})^\alpha (d_{yz} - \pi_y^*)^2 (d_{x^2-y^2})^\beta \rangle
\end{aligned}$$

State 12,  $S_{11}$

$$\begin{aligned}
|S_{11}\rangle = & +0.1472 |(\text{Cl } p_x)^2(\text{Cl } p_y)^2(\text{Cl } p_z)^2(\sigma_{\text{NO}})^2(\pi_x)^2(\pi_y)^2(d_{xy})^2(d_{xz})^\alpha(d_{yz})^2(d_{z^2})^\beta\rangle \\
& -0.1472 |(\text{Cl } p_x)^2(\text{Cl } p_y)^2(\text{Cl } p_z)^2(\sigma_{\text{NO}})^2(\pi_x)^2(\pi_y)^2(d_{xy})^2(d_{xz})^\beta(d_{yz})^2(d_{z^2})^\alpha\rangle \\
& +0.5566 |(\text{Cl } p_x)^2(\text{Cl } p_y)^2(\text{Cl } p_z)^2(\sigma_{\text{NO}})^2(\pi_x)^2(\pi_y)^2(d_{xy})^2(d_{xz})^\alpha(d_{yz})^2(d_{x^2-y^2})^\beta\rangle \\
& -0.5566 |(\text{Cl } p_x)^2(\text{Cl } p_y)^2(\text{Cl } p_z)^2(\sigma_{\text{NO}})^2(\pi_x)^2(\pi_y)^2(d_{xy})^2(d_{xz})^\beta(d_{yz})^2(d_{x^2-y^2})^\alpha\rangle \\
& -0.1459 |(\text{Cl } p_x)^2(\text{Cl } p_y)^2(\text{Cl } p_z)^2(\sigma_{\text{NO}})^2(\pi_x)^2(\pi_y)^2(d_{xy})^2(d_{xz})^\beta(d_{yz})^\alpha(d_{xz} - \pi_x^*)^\beta(d_{x^2-y^2})^\alpha\rangle \\
& -0.1459 |(\text{Cl } p_x)^2(\text{Cl } p_y)^2(\text{Cl } p_z)^2(\sigma_{\text{NO}})^2(\pi_x)^2(\pi_y)^2(d_{xy})^2(d_{xz})^\alpha(d_{yz})^\beta(d_{xz} - \pi_x^*)^\alpha(d_{x^2-y^2})^\beta\rangle \\
& -0.1398 |(\text{Cl } p_x)^2(\text{Cl } p_y)^2(\text{Cl } p_z)^2(\sigma_{\text{NO}})^2(\pi_x)^2(\pi_y)^2(d_{xy})^2(d_{yz})^2(d_{yz} - \pi_y^*)^\beta(d_{x^2-y^2})^\alpha\rangle \\
& +0.1398 |(\text{Cl } p_x)^2(\text{Cl } p_y)^2(\text{Cl } p_z)^2(\sigma_{\text{NO}})^2(\pi_x)^2(\pi_y)^2(d_{xy})^2(d_{yz})^2(d_{yz} - \pi_y^*)^\alpha(d_{x^2-y^2})^\beta\rangle \\
& +0.1289 |(\text{Cl } p_x)^2(\text{Cl } p_y)^2(\text{Cl } p_z)^2(\sigma_{\text{NO}})^2(\pi_x)^2(\pi_y)^2(d_{xy})^2(d_{xz})^\beta(d_{yz})^\beta(d_{xz} - \pi_x^*)^\alpha(d_{x^2-y^2})^\alpha\rangle \\
& +0.1289 |(\text{Cl } p_x)^2(\text{Cl } p_y)^2(\text{Cl } p_z)^2(\sigma_{\text{NO}})^2(\pi_x)^2(\pi_y)^2(d_{xy})^2(d_{xz})^\alpha(d_{yz})^\alpha(d_{xz} - \pi_x^*)^\beta(d_{x^2-y^2})^\beta\rangle \\
& -0.1072 |(\text{Cl } p_x)^2(\text{Cl } p_y)^2(\text{Cl } p_z)^2(\sigma_{\text{NO}})^2(\pi_x)^2(\pi_y)^2(d_{xy})^2(d_{xz})^\alpha(d_{xz} - \pi_x^*)^2(d_{x^2-y^2})^\beta\rangle \\
& +0.1072 |(\text{Cl } p_x)^2(\text{Cl } p_y)^2(\text{Cl } p_z)^2(\sigma_{\text{NO}})^2(\pi_x)^2(\pi_y)^2(d_{xy})^2(d_{xz})^\beta(d_{xz} - \pi_x^*)^2(d_{x^2-y^2})^\alpha\rangle
\end{aligned}$$

## 5- Triplet electronic configurations

### State 1, $T_1$

$$|T_1\rangle = +0.6796 |(Cl p_x)^2 (Cl p_y)^2 (Cl p_z)^2 (\sigma_{NO})^2 (\pi_x)^2 (\pi_y)^2 (d_{xy})^2 (d_{xz})^2 (d_{yz})^\alpha (d_{xz} - \pi_x^*)^\alpha \\ +0.6586 |(Cl p_x)^2 (Cl p_y)^2 (Cl p_z)^2 (\sigma_{NO})^2 (\pi_x)^2 (\pi_y)^2 (d_{xy})^2 (d_{xz})^\alpha (d_{yz})^2 (d_{yz} - \pi_y^*)^\alpha$$

### State 2, $T_2$

$$|T_2\rangle = -0.9039 |(Cl p_x)^2 (Cl p_y)^2 (Cl p_z)^2 (\sigma_{NO})^2 (\pi_x)^2 (\pi_y)^2 (d_{xy})^\alpha (d_{xz})^2 (d_{yz})^2 (d_{yz} - \pi_y^*)^\alpha \\ -0.1860 |(Cl p_x)^2 (Cl p_y)^2 (Cl p_z)^2 (\sigma_{NO})^2 (\pi_x)^2 (\pi_y)^2 (d_{xy})^\alpha (d_{xz})^\alpha (d_{yz})^2 (d_{yz} - \pi_y^*)^2 \\ -0.1850 |(Cl p_x)^2 (Cl p_y)^2 (Cl p_z)^2 (\sigma_{NO})^2 (\pi_x)^2 (\pi_y)^2 (d_{xy})^\alpha (d_{xz})^2 (d_{yz})^\beta (d_{xz} - \pi_x^*)^\alpha (d_{yz} - \pi_y^*)^\alpha \\ +0.1701 |(Cl p_x)^2 (Cl p_y)^2 (Cl p_z)^2 (\sigma_{NO})^2 (\pi_x)^2 (\pi_y)^2 (d_{xy})^\alpha (d_{xz})^2 (d_{yz})^\alpha (d_{xz} - \pi_x^*)^\beta (d_{yz} - \pi_y^*)^\beta \\ +0.1323 |(Cl p_x)^2 (Cl p_y)^2 (Cl p_z)^2 (\sigma_{NO})^2 (\pi_y)^2 (d_{xy})^\alpha (d_{xz})^2 (d_{yz})^2 (d_{xz} - \pi_x^*)^2 (d_{yz} - \pi_y^*)^\alpha$$

### State 3, $T_3$

$$|T_3\rangle = +0.9041 |(Cl p_x)^2 (Cl p_y)^2 (Cl p_z)^2 (\sigma_{NO})^2 (\pi_x)^2 (\pi_y)^2 (d_{xy})^\alpha (d_{xz})^2 (d_{yz})^2 (d_{xz} - \pi_x^*)^\alpha \\ +0.1864 |(Cl p_x)^2 (Cl p_y)^2 (Cl p_z)^2 (\sigma_{NO})^2 (\pi_x)^2 (\pi_y)^2 (d_{xy})^\alpha (d_{xz})^2 (d_{yz})^\alpha (d_{xz} - \pi_x^*)^2 \\ -0.1844 |(Cl p_x)^2 (Cl p_y)^2 (Cl p_z)^2 (\sigma_{NO})^2 (\pi_x)^2 (\pi_y)^2 (d_{xy})^\alpha (d_{xz})^\beta (d_{yz})^2 (d_{xz} - \pi_x^*)^\alpha (d_{yz} - \pi_y^*)^\alpha \\ +0.1695 |(Cl p_x)^2 (Cl p_y)^2 (Cl p_z)^2 (\sigma_{NO})^2 (\pi_x)^2 (\pi_y)^2 (d_{xy})^\alpha (d_{xz})^\alpha (d_{yz})^2 (d_{xz} - \pi_x^*)^\alpha (d_{yz} - \pi_y^*)^\beta \\ -0.1324 |(Cl p_x)^2 (Cl p_y)^2 (Cl p_z)^2 (\sigma_{NO})^2 (\pi_x)^2 (d_{xy})^\alpha (d_{xz})^2 (d_{yz})^2 (d_{xz} - \pi_x^*)^\alpha (d_{yz} - \pi_y^*)^2$$

### State 4, $T_4$

$$|T_4\rangle = -0.6522 |(Cl p_x)^2 (Cl p_y)^2 (Cl p_z)^2 (\sigma_{NO})^2 (\pi_x)^2 (\pi_y)^2 (d_{xy})^2 (d_{xz})^2 (d_{yz})^\alpha (d_{xz} - \pi_x^*)^\alpha \\ +0.6731 |(Cl p_x)^2 (Cl p_y)^2 (Cl p_z)^2 (\sigma_{NO})^2 (\pi_x)^2 (\pi_y)^2 (d_{xy})^2 (d_{xz})^\alpha (d_{yz})^2 (d_{yz} - \pi_y^*)^\alpha$$

### State 5, $T_5$

$$|T_5\rangle = -0.1116 |(Cl p_x)^2 (Cl p_y)^2 (Cl p_z)^2 (\sigma_{NO})^2 (\pi_x)^2 (\pi_y)^2 (d_{xy})^\alpha (d_{xz})^2 (d_{yz})^2 (d_{z^2})^\alpha \\ -0.6787 |(Cl p_x)^2 (Cl p_y)^2 (Cl p_z)^2 (\sigma_{NO})^2 (\pi_x)^2 (\pi_y)^2 (d_{xy})^2 (d_{xz})^2 (d_{yz})^\alpha (d_{yz} - \pi_y^*)^\alpha \\ -0.6375 |(Cl p_x)^2 (Cl p_y)^2 (Cl p_z)^2 (\sigma_{NO})^2 (\pi_x)^2 (\pi_y)^2 (d_{xy})^2 (d_{xz})^\alpha (d_{yz})^2 (d_{xz} - \pi_x^*)^\alpha$$

### State 6, $T_6$

$$|T_6\rangle = -0.4539 |(Cl p_x)^2 (Cl p_y)^2 (Cl p_z)^2 (\sigma_{NO})^2 (\pi_x)^2 (\pi_y)^2 (d_{xy})^\alpha (d_{xz})^2 (d_{yz})^2 (d_{x^2-y^2})^\alpha \\ -0.5447 |(Cl p_x)^2 (Cl p_y)^2 (Cl p_z)^2 (\sigma_{NO})^2 (\pi_x)^2 (\pi_y)^2 (d_{xy})^2 (d_{xz})^2 (d_{yz})^\alpha (d_{yz} - \pi_y^*)^\alpha \\ +0.5848 |(Cl p_x)^2 (Cl p_y)^2 (Cl p_z)^2 (\sigma_{NO})^2 (\pi_x)^2 (\pi_y)^2 (d_{xy})^2 (d_{xz})^\alpha (d_{yz})^2 (d_{xz} - \pi_x^*)^\alpha$$

### State 7, $T_7$

$$|T_7\rangle = +0.7469 |(Cl p_x)^2 (Cl p_y)^2 (Cl p_z)^2 (\sigma_{NO})^2 (\pi_x)^2 (\pi_y)^2 (d_{xy})^\alpha (d_{xz})^2 (d_{yz})^2 (d_{x^2-y^2})^\alpha \\ -0.3266 |(Cl p_x)^2 (Cl p_y)^2 (Cl p_z)^2 (\sigma_{NO})^2 (\pi_x)^2 (\pi_y)^2 (d_{xy})^2 (d_{xz})^2 (d_{yz})^\alpha (d_{yz} - \pi_y^*)^\alpha \\ +0.3398 |(Cl p_x)^2 (Cl p_y)^2 (Cl p_z)^2 (\sigma_{NO})^2 (\pi_x)^2 (\pi_y)^2 (d_{xy})^2 (d_{xz})^\alpha (d_{yz})^2 (d_{xz} - \pi_x^*)^\alpha \\ +0.1337 |(Cl p_x)^2 (Cl p_y)^2 (Cl p_z)^2 (\sigma_{NO})^2 (\pi_x)^2 (\pi_y)^2 (d_{xy})^\alpha (d_{xz})^\alpha (d_{yz})^2 (d_{yz} - \pi_y^*)^\beta (d_{x^2-y^2})^\alpha \\ +0.1335 |(Cl p_x)^2 (Cl p_y)^2 (Cl p_z)^2 (\sigma_{NO})^2 (\pi_x)^2 (\pi_y)^2 (d_{xy})^\alpha (d_{xz})^2 (d_{yz})^\alpha (d_{xz} - \pi_x^*)^\beta (d_{x^2-y^2})^\alpha \\ -0.1242 |(Cl p_x)^2 (Cl p_y)^2 (Cl p_z)^2 (\sigma_{NO})^2 (\pi_x)^2 (\pi_y)^2 (d_{xy})^\alpha (d_{xz})^2 (d_{xz} - \pi_x^*)^2 (d_{x^2-y^2})^\alpha \\ -0.1239 |(Cl p_x)^2 (Cl p_y)^2 (Cl p_z)^2 (\sigma_{NO})^2 (\pi_x)^2 (\pi_y)^2 (d_{xy})^\alpha (d_{yz})^2 (d_{yz} - \pi_y^*)^2 (d_{x^2-y^2})^\alpha$$
